# Supplementary material
Source: Springer Nature journal article supplement (https://www.springermedizin.de/resource/supplementary/13011_2012_218_MOESM1_ESM.pdf/9628658)
Supplement: MOESM1 [file 9628658]

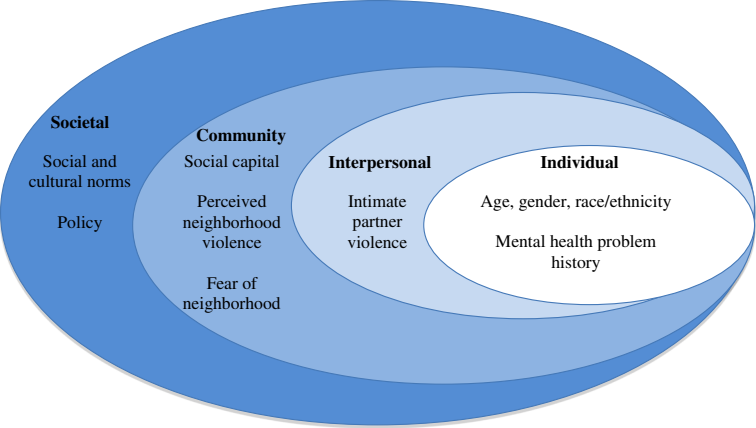

**Societal**

Social and cultural norms

Policy

**Community**

Social capital

Perceived neighborhood violence

Fear of neighborhood

**Interpersonal**

Intimate partner violence

**Individual**

Age, gender, race/ethnicity

Mental health problem history
